# Supplementary material
Source: PubMed Central journal article supplement (PMC2784692)

**ROMP from ROMP: A New Approach to Graft Copolymer Synthesis**

Matthew J. Allen,<sup>†,§</sup> Kittikhun Wangkanont,<sup>†</sup> Ronald T. Raines,<sup>†,‡</sup> and Laura L. Kiessling<sup>†,‡,\*</sup>

*Contribution from the Departments of Chemistry and Biochemistry, University of Wisconsin–Madison, Madison, WI 53706*

<sup>†</sup>Department of Chemistry

<sup>§</sup>Present Address: Department of Chemistry, Wayne State University, Detroit, MI 48202

<sup>‡</sup>Department of Biochemistry

E-mail: kiessling@chem.wisc.edu

---

| <b>Page</b> | <b>Contents</b>                            |
|-------------|--------------------------------------------|
| S1          | Table of Contents                          |
| S2–S6       | SEC Traces of All Polymers                 |
| S6–S12      | <sup>1</sup> H NMR Spectra of All Polymers |

---

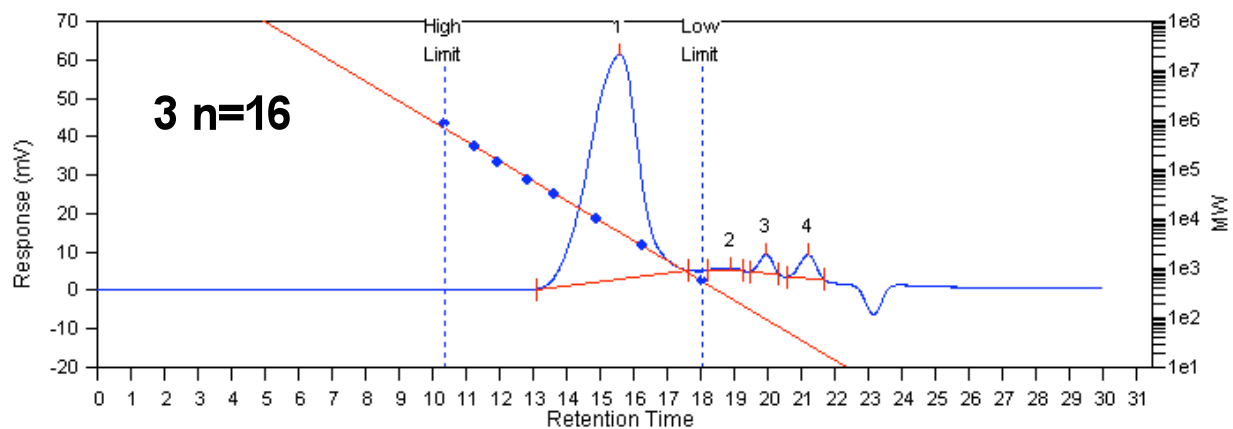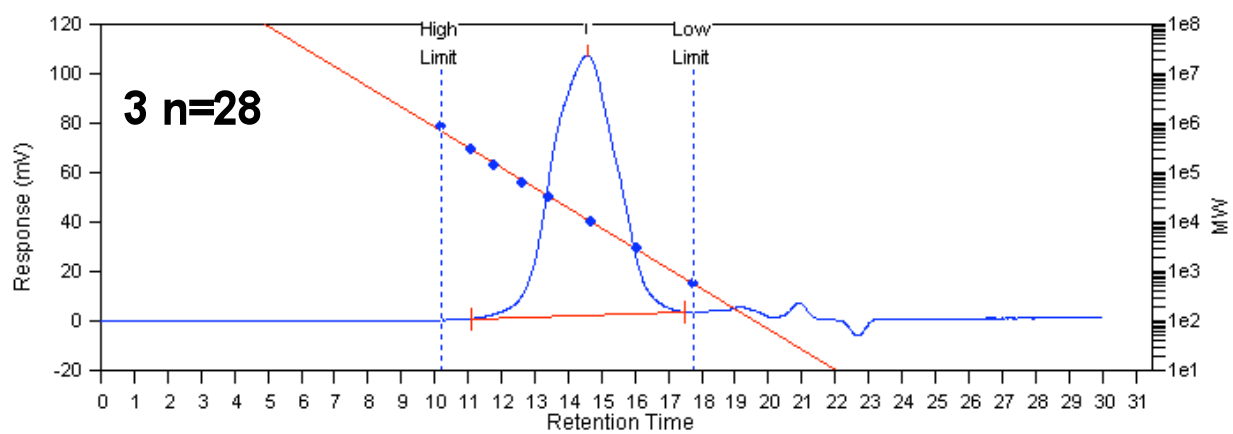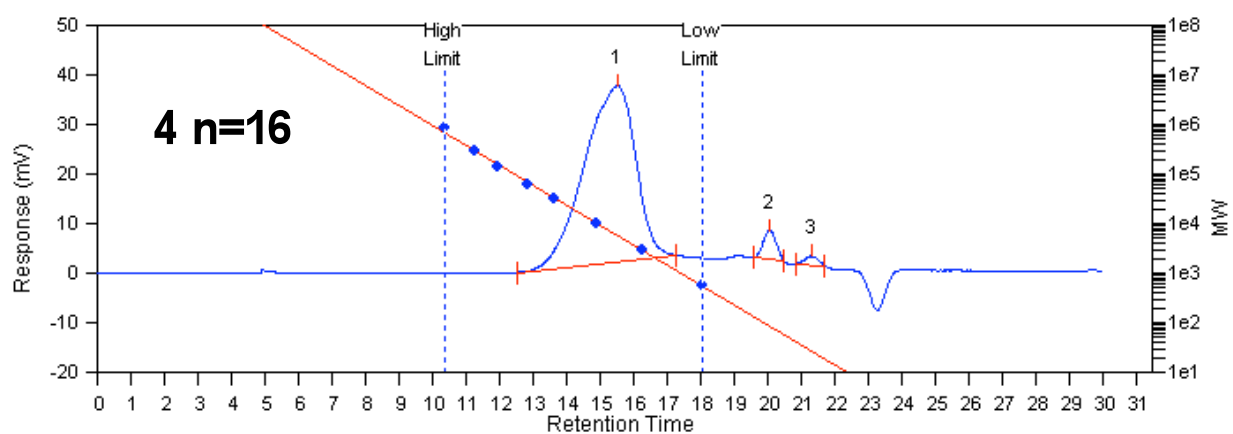

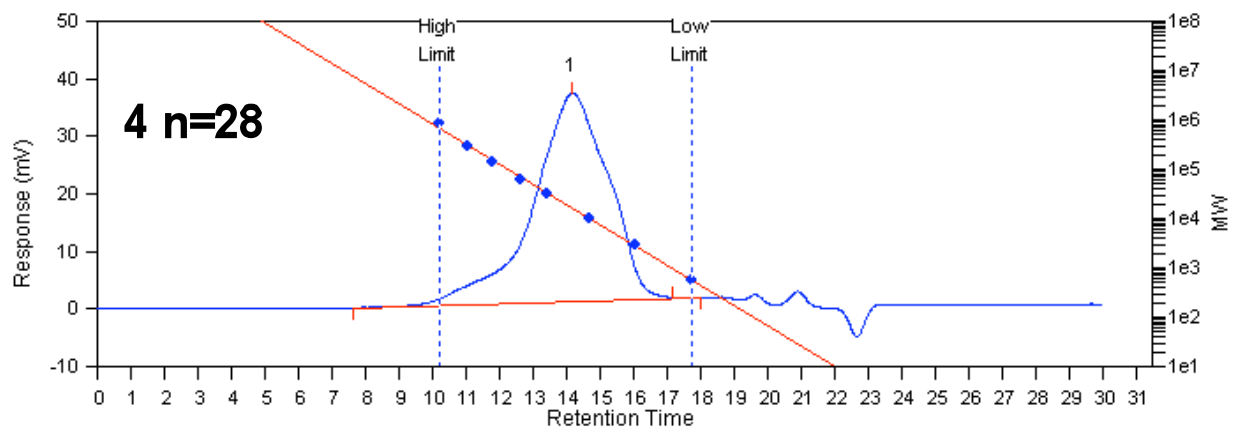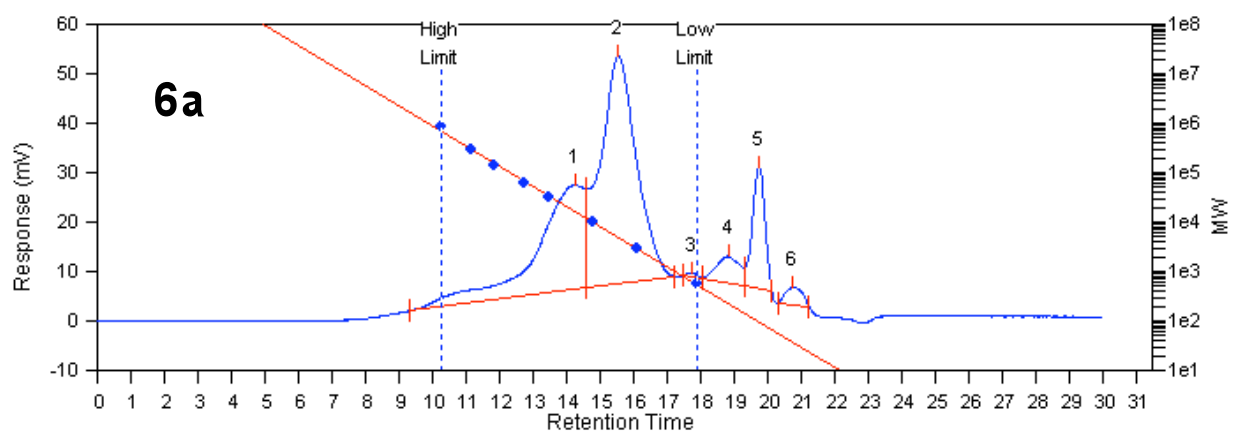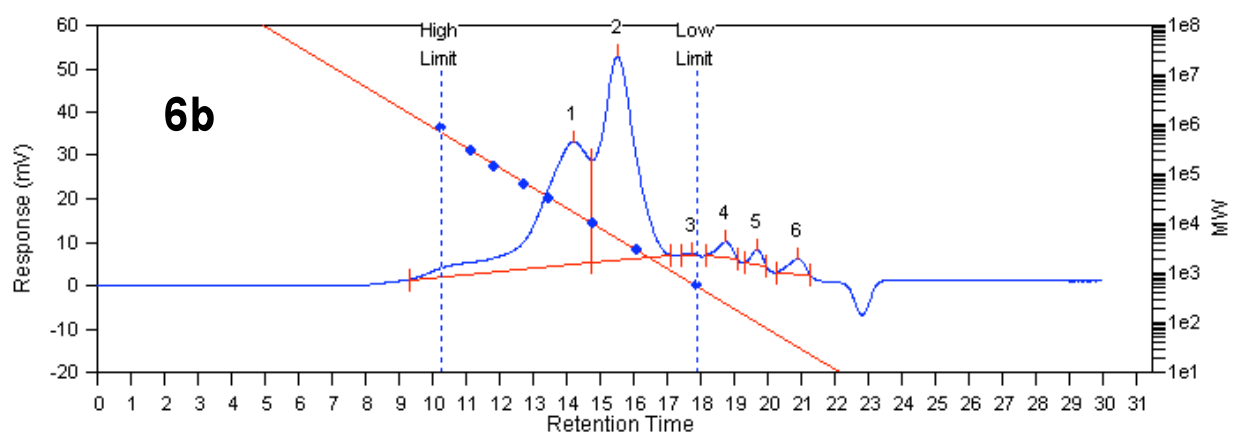

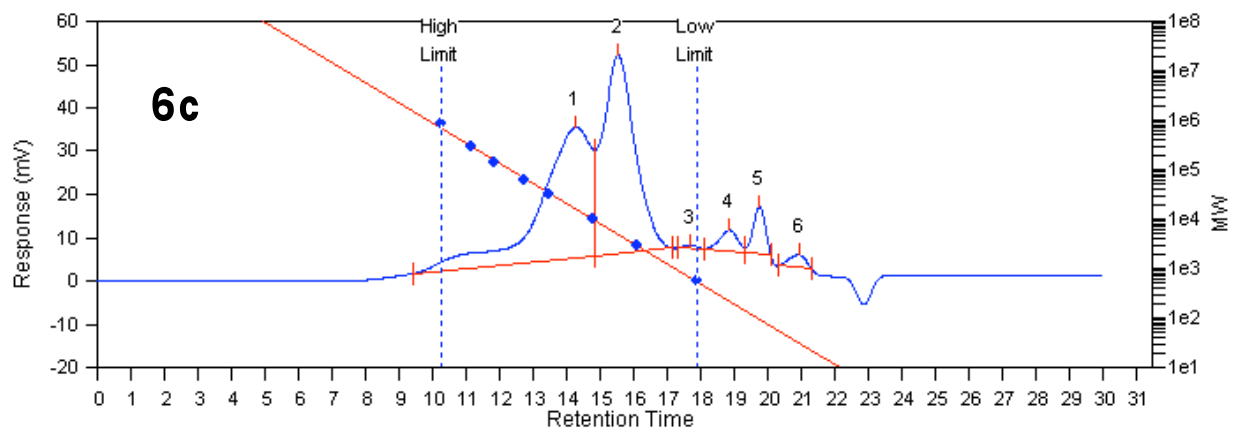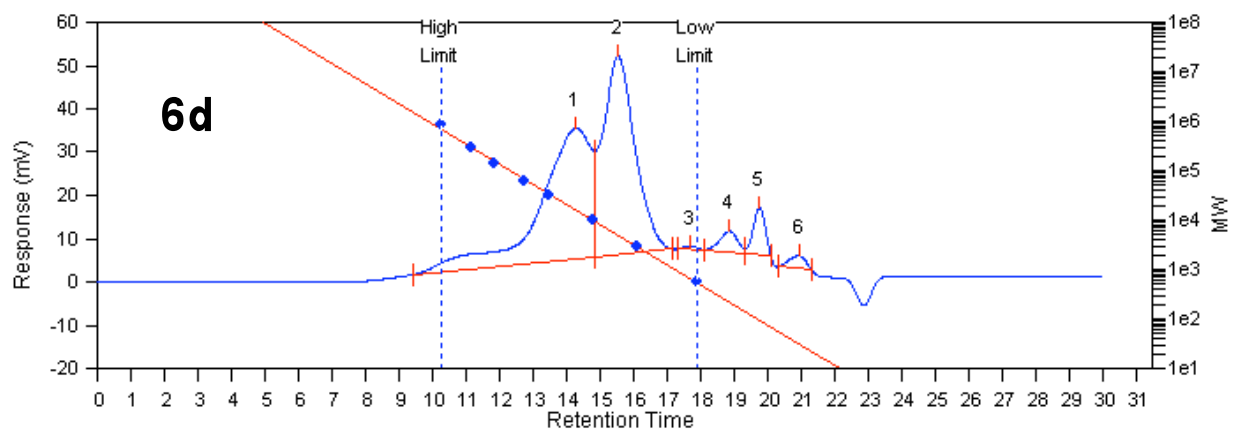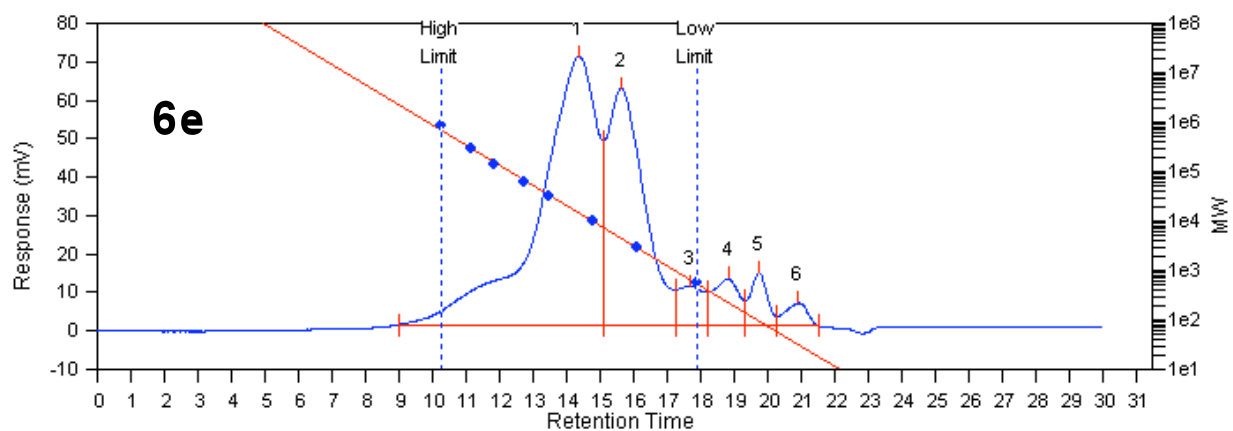

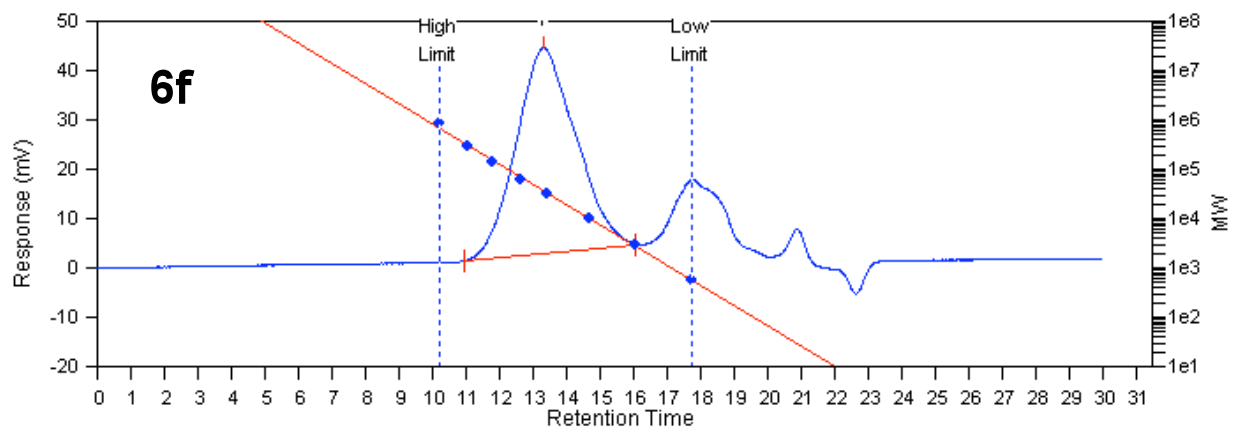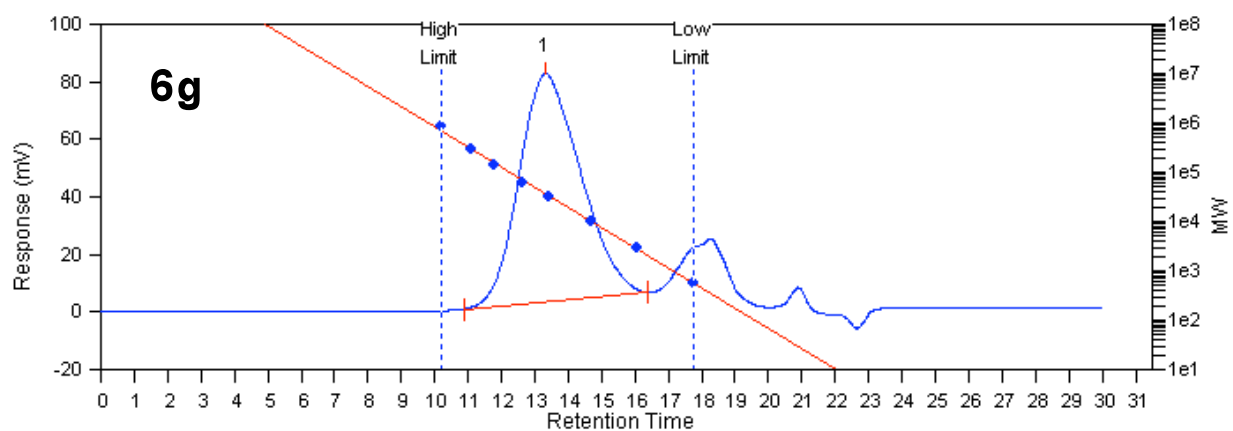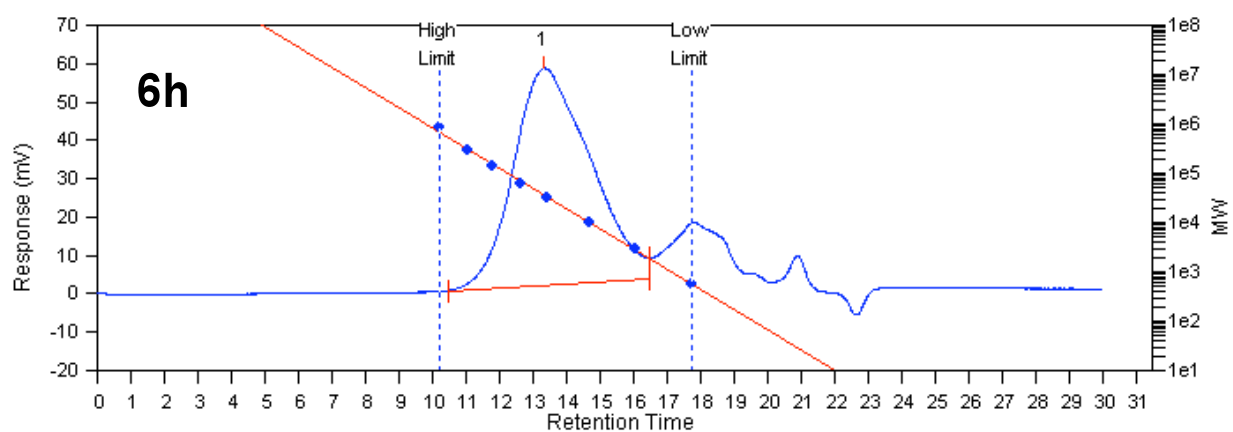

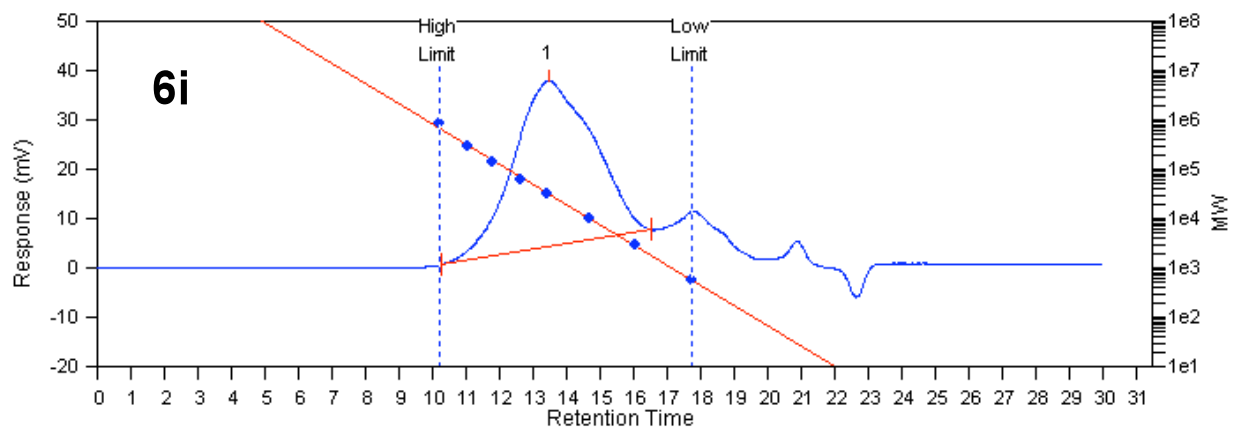

**3 n=16**

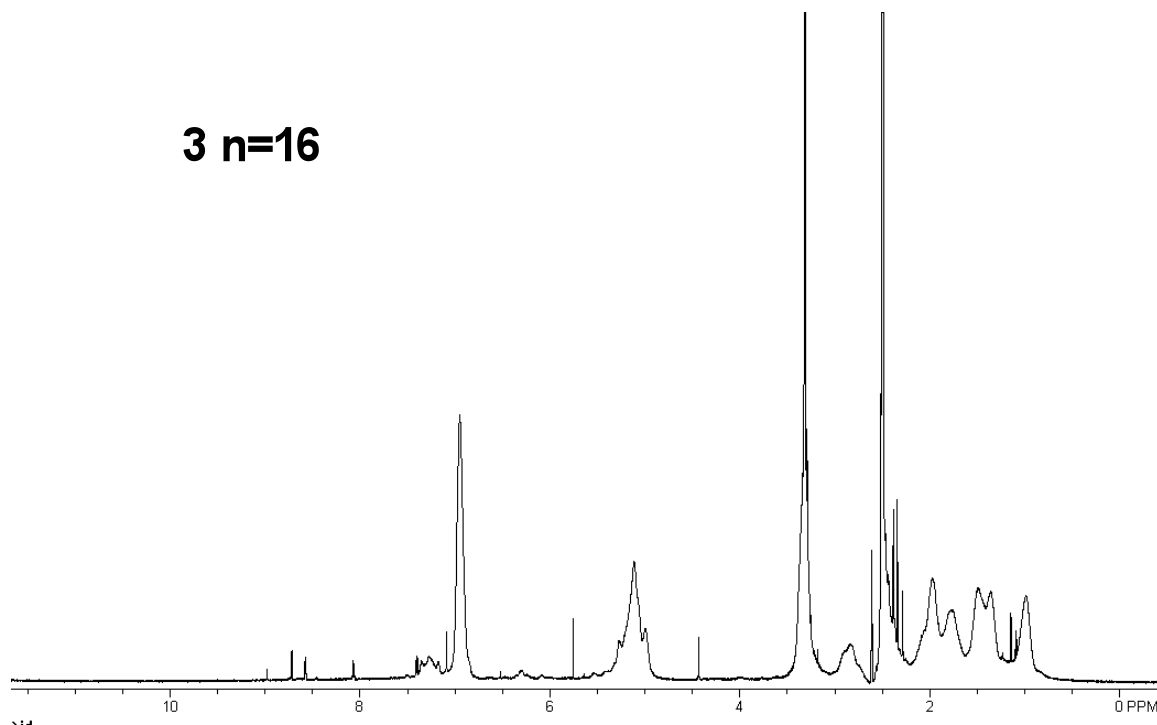

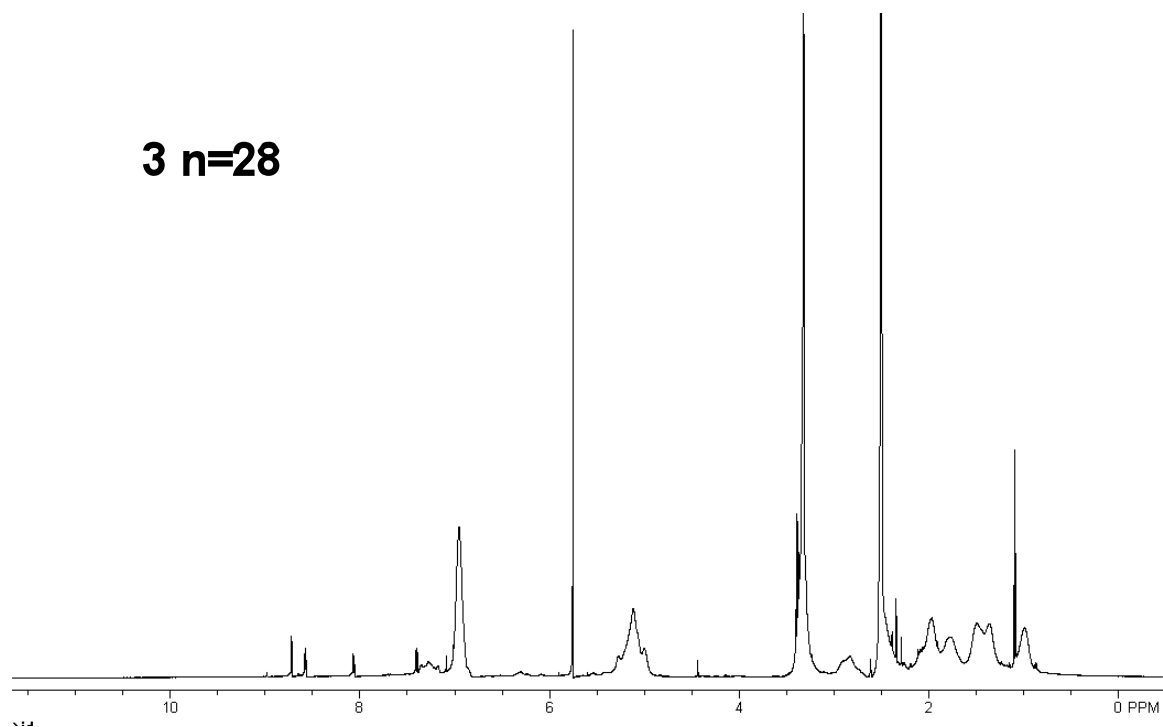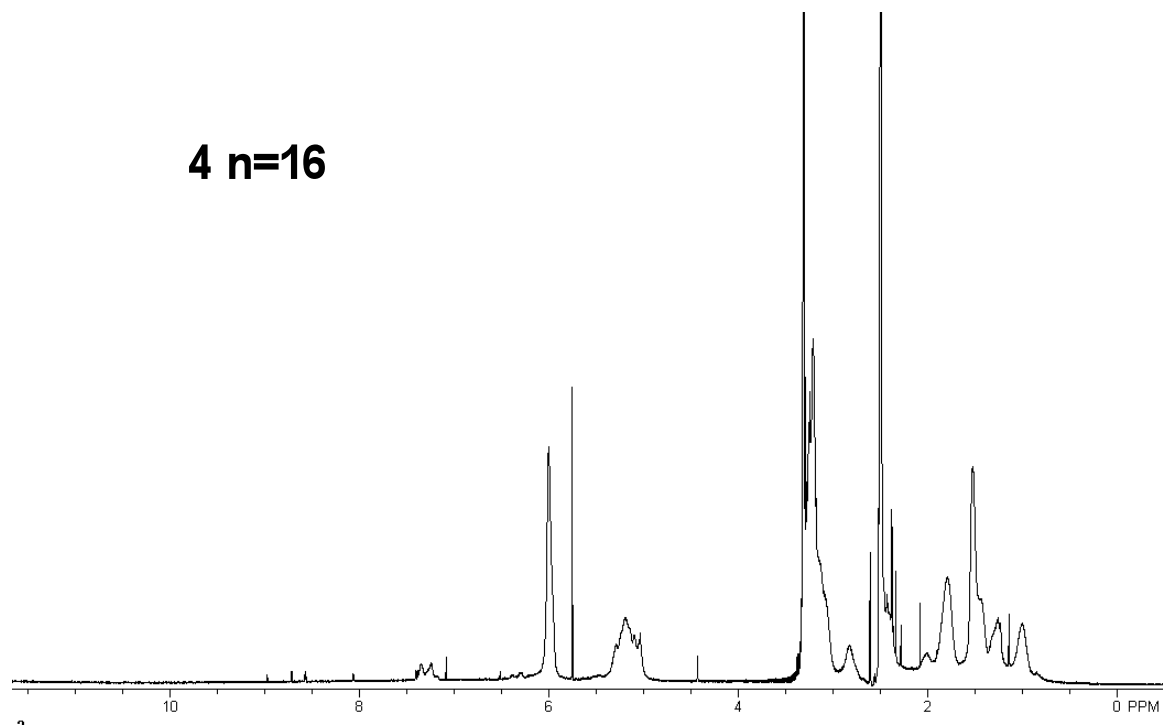

**4 n=28**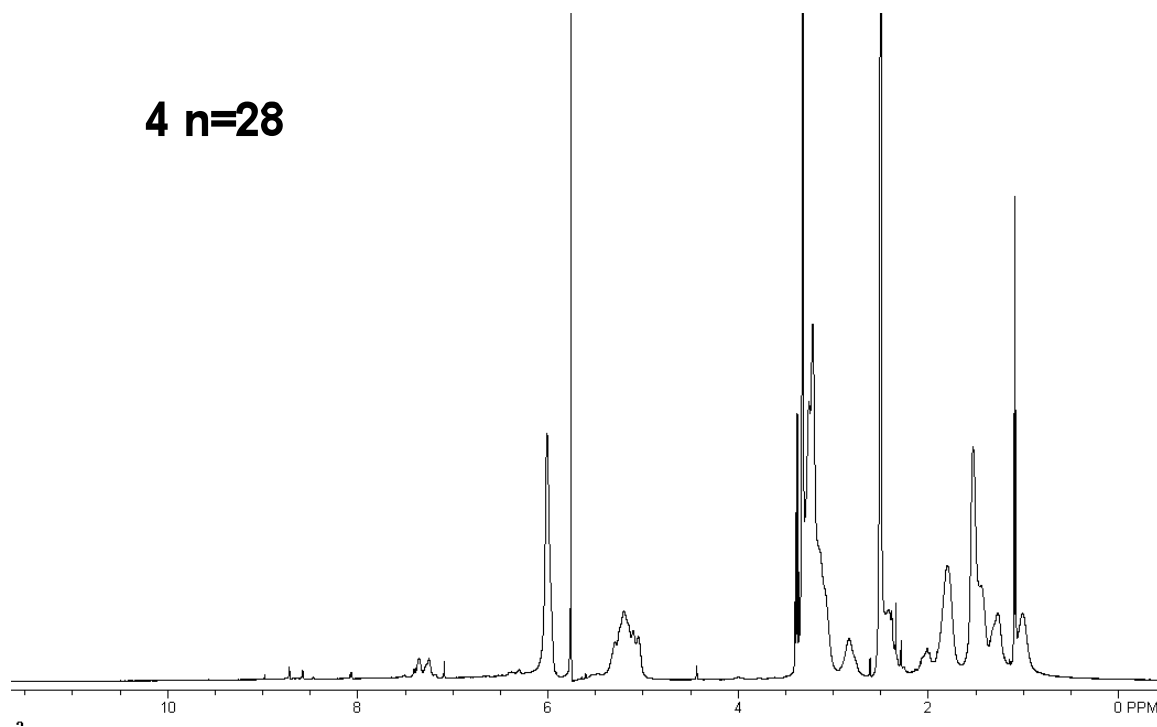**6a**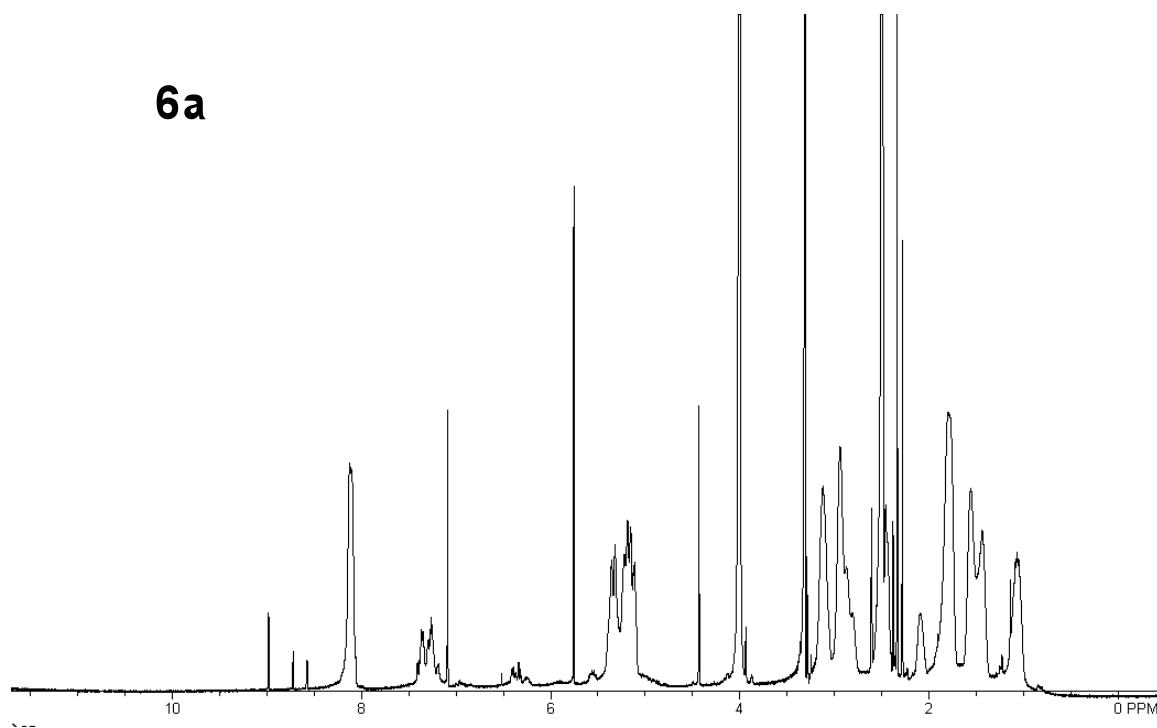



**6b**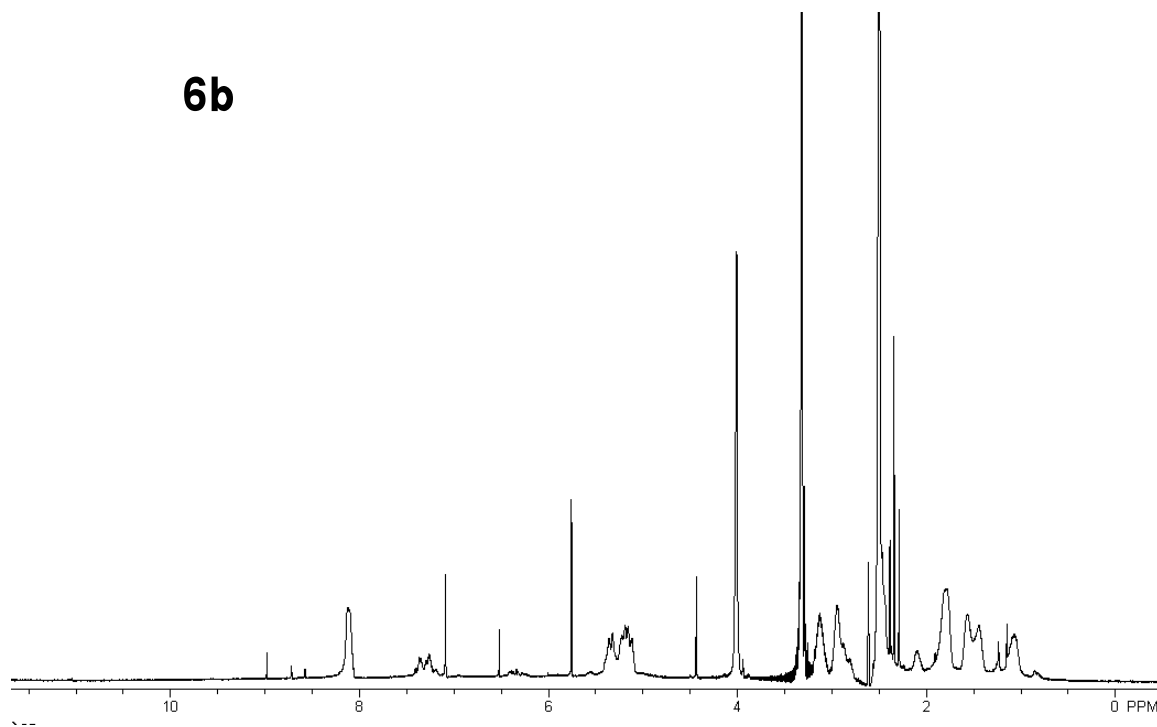**6c**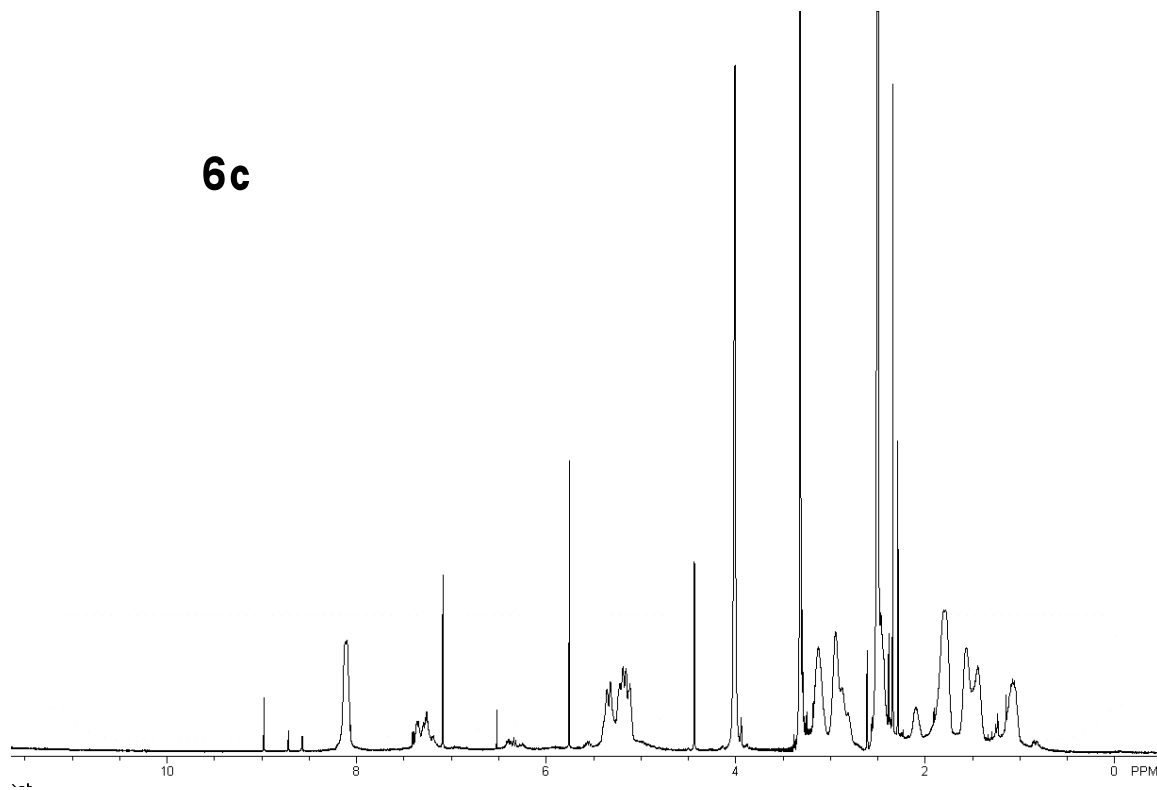

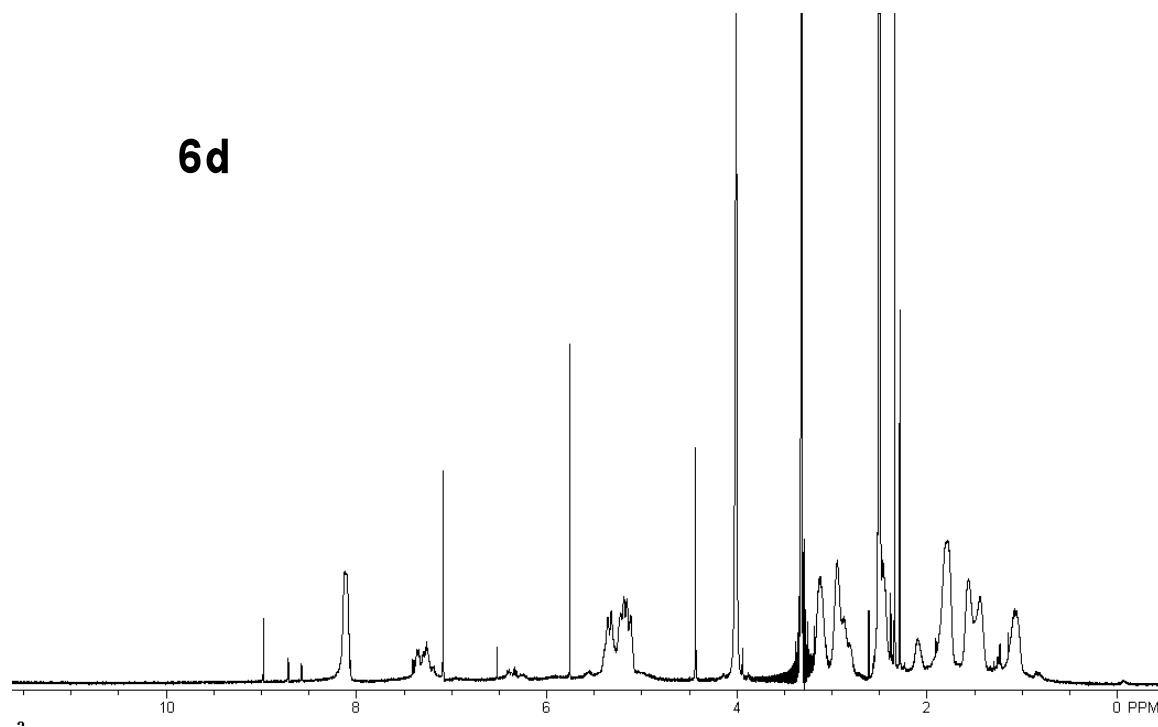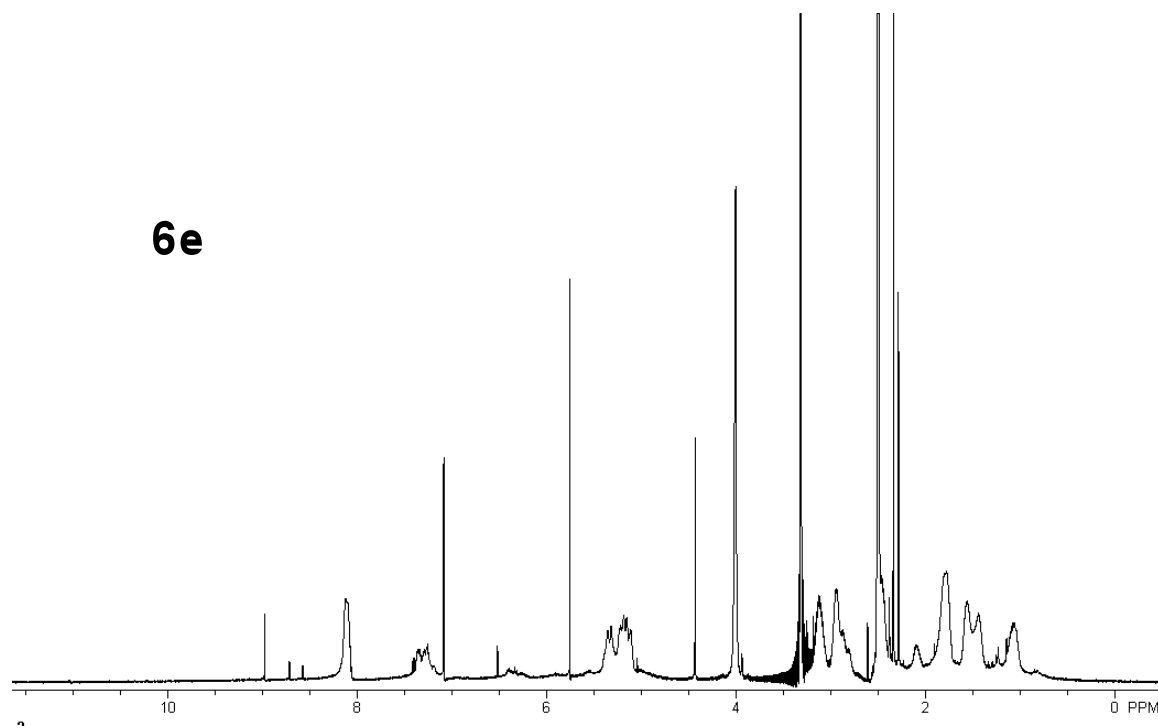

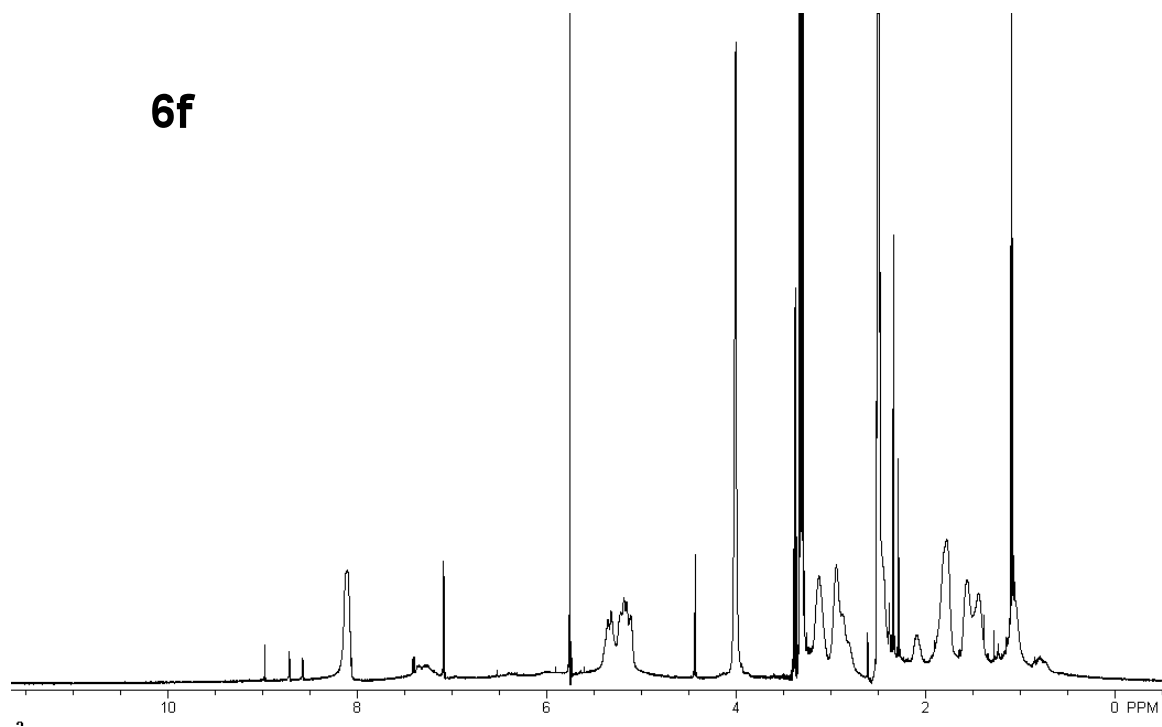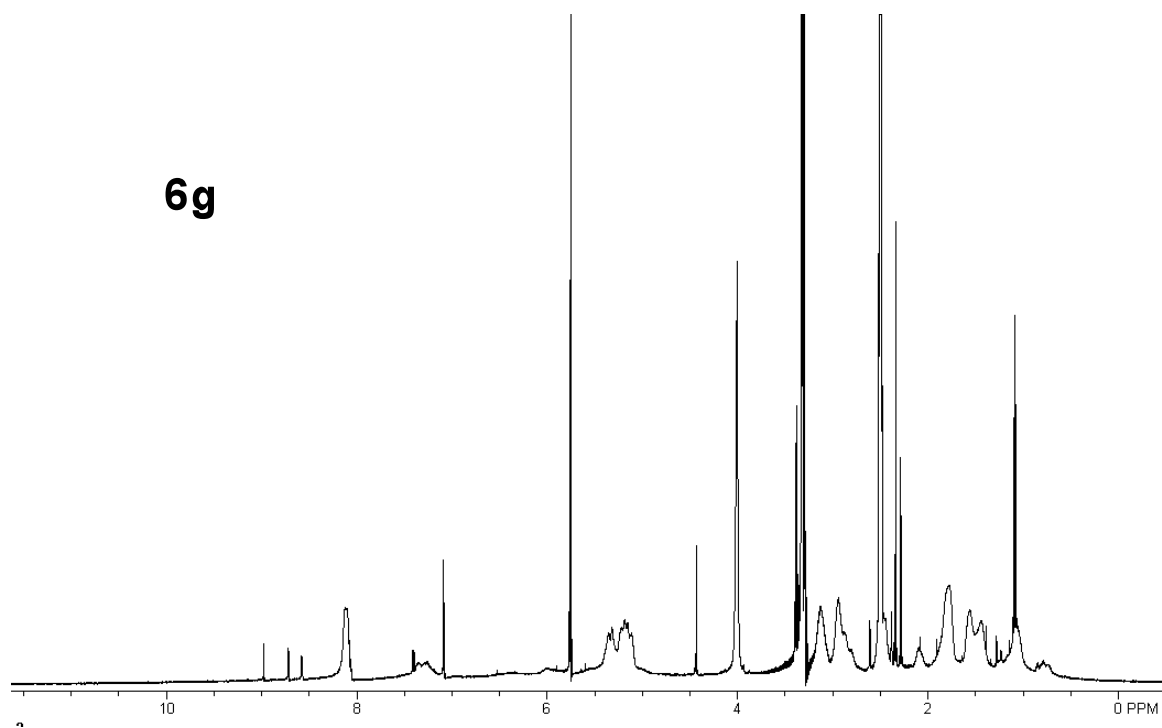

**6h**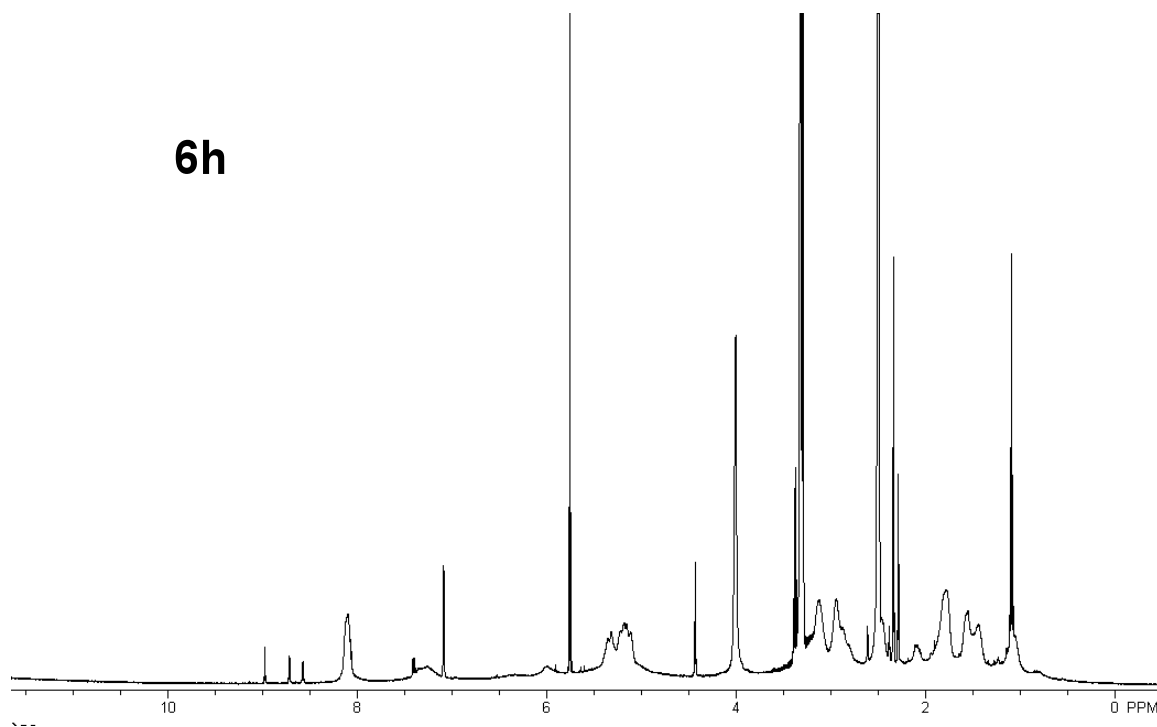**6i**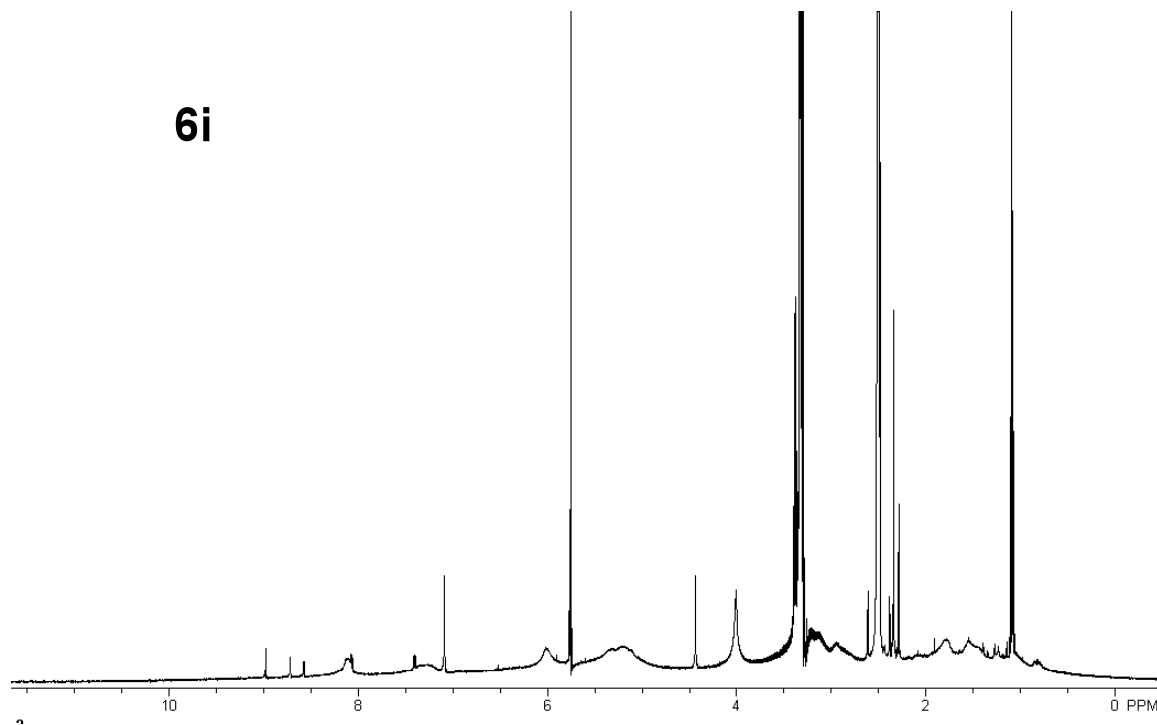

Supplement: NIHMS153144-supplement-supporting_informaiton.pdf [file NIHMS153144-supplement-supporting_informaiton.pdf]
